# Supplementary material for: Fractional Brownian motion, the Matérn process, and stochastic modeling of turbulent dispersion
Source: Copernicus journal article supplement (doi:10.5194/npg-24-481-2017), 2017-08-21
Supplement: Supplementary file [file npg-24-481-2017-supplement-title-page.pdf › npg-24-481-2017-supplement-title-page.pdf]

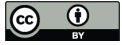

*Supplement of*

## **Fractional Brownian motion, the Matérn process, and stochastic modeling of turbulent dispersion**

**Jonathan M. Lilly et al.**

*Correspondence to:* Jonathan M. Lilly ([lilly@nwra.com](mailto:lilly@nwra.com))

- [npg-24-481-2017-supplement-title-page.pdf](#)
- [dispersionmovie.mp4](#)
- [turbulencemovie.mp4](#)

The copyright of individual parts of the supplement might differ from the CC BY 3.0 License.
